# Supplementary material for: MiR-571 affects the development and progression of liver fibrosis by regulating the Notch3 pathway
Source: Research Square preprint supplement (doi:10.21203/rs.3.rs-360390/v1), 2021-04-06

MiR-571 affects the development and progression of liver fibrosis by regulating the Notch3 pathway


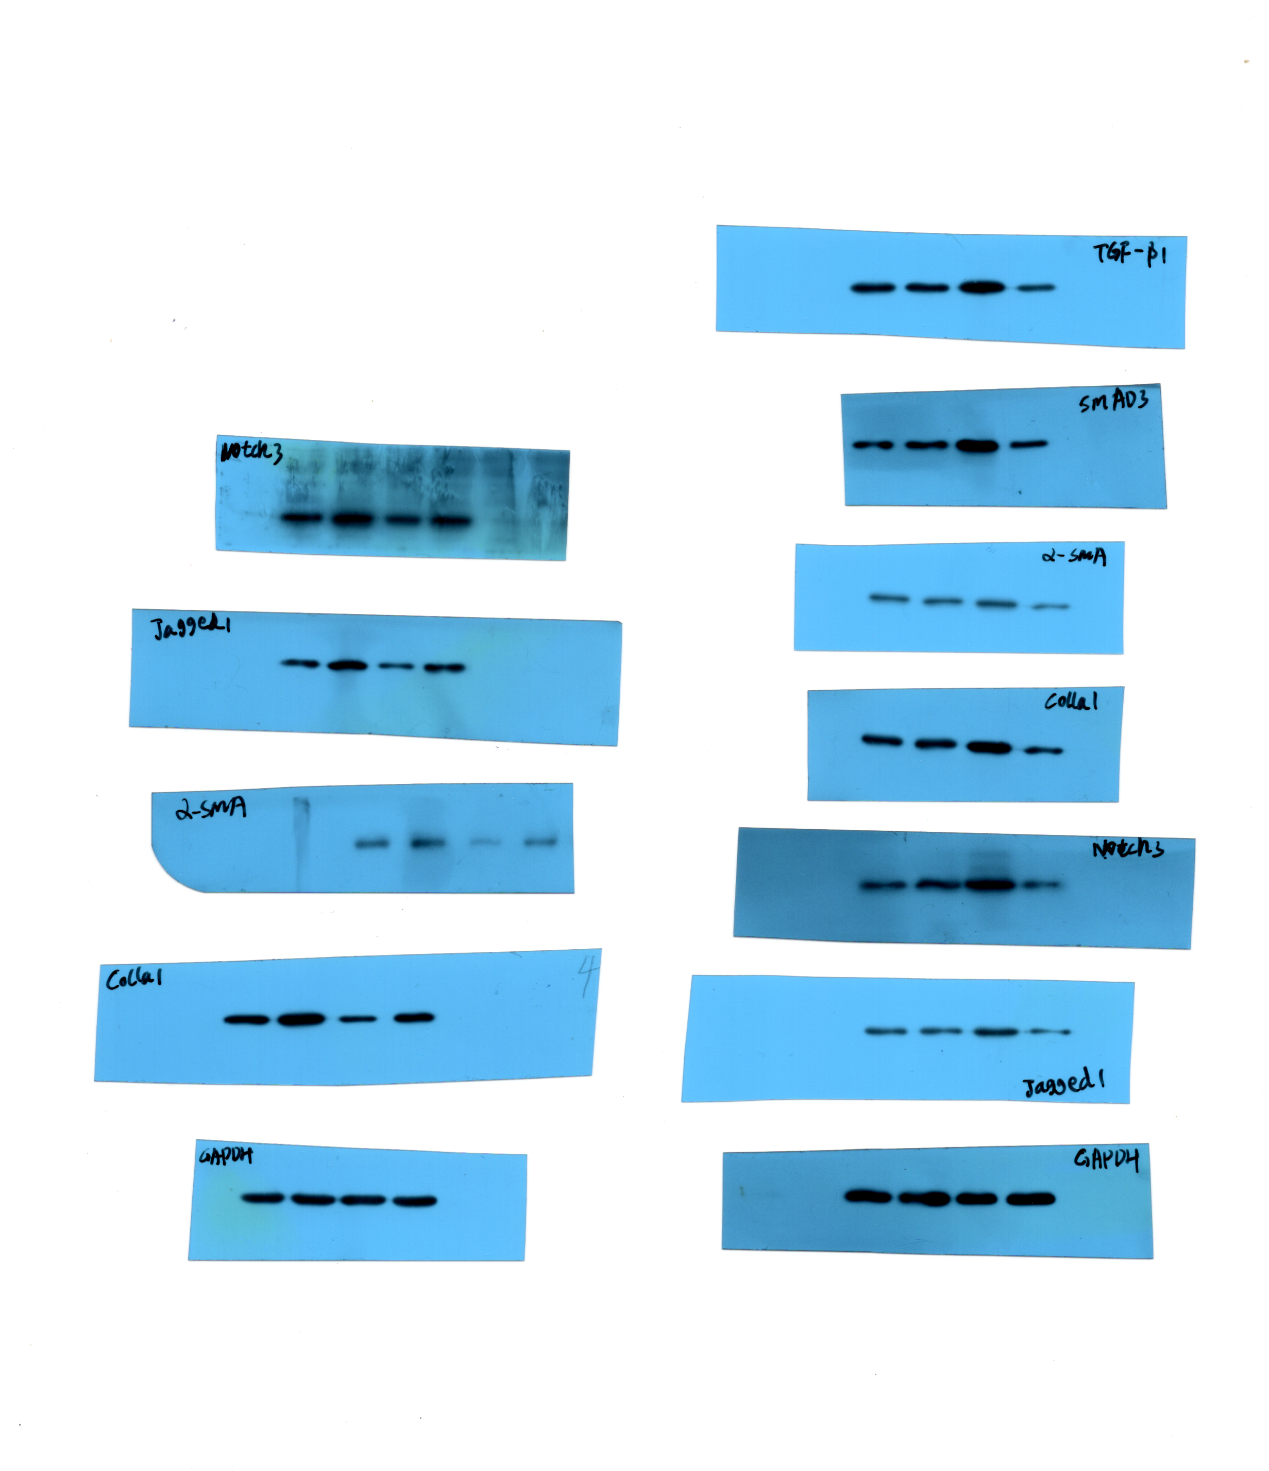

Supplement: Supplementary file 1 [file b3210f81e3be90ea5ac635bc.docx]
